# Supplementary material
Source: PubMed Central journal article supplement (PMC6214843)
Supplement: NIHMS977256-supplement-1.pdf [file NIHMS977256-supplement-1.pdf]

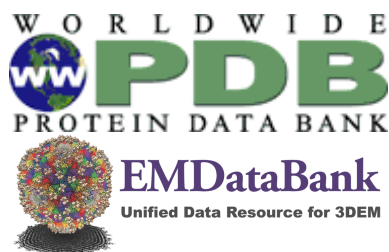

# Full wwPDB/EMDatabank EM Map/Model Validation Report ⓘ

Jun 13, 2018 – 12:53 AM EDT

Deposition ID : D\_1000231110  
PDB ID : *(not yet assigned)*

This is a Full wwPDB/EMDatabank EM Map/Model Validation Report.

This report is produced by the wwPDB Deposition System during initial deposition but before annotation of the structure.

We welcome your comments at [validation@mail.wwpdb.org](mailto:validation@mail.wwpdb.org)

A user guide is available at

<https://www.wwpdb.org/validation/2017/EMValidationReportHelp>

with specific help available everywhere you see the ⓘ symbol.

---

MolProbity : 4.02b-467  
Mogul : 1.7.3 (157068), CSD as539be (2018)  
Percentile statistics : 20171227.v01 (using entries in the PDB archive December 27th 2017)  
Ideal geometry (proteins) : Engh & Huber (2001)  
Ideal geometry (DNA, RNA) : Parkinson et. al. (1996)  
Validation Pipeline (wwPDB-VP) : rb-20031172

# 1 Overall quality at a glance i

The following experimental techniques were used to determine the structure:  
*ELECTRON MICROSCOPY*

The reported resolution of this entry is unknown.

Percentile scores (ranging between 0-100) for global validation metrics of the entry are shown in the following graphic. The table shows the number of entries on which the scores are based.

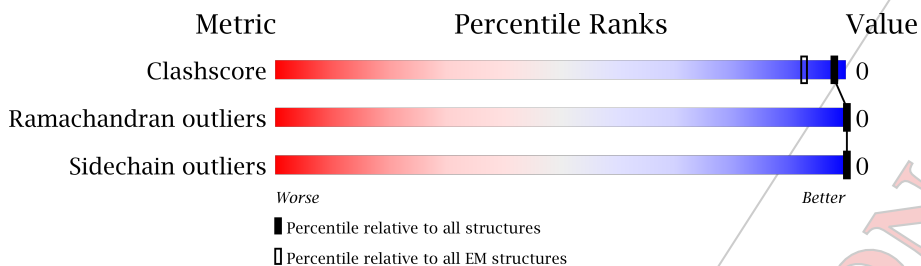

| Metric                | Whole archive (#Entries) | EM structures (#Entries) |
|-----------------------|--------------------------|--------------------------|
| Clashscore            | 136327                   | 1886                     |
| Ramachandran outliers | 132723                   | 1663                     |
| Sidechain outliers    | 132532                   | 1531                     |

The table below summarises the geometric issues observed across the polymeric chains. The red, orange, yellow and green segments on the bar indicate the fraction of residues that contain outliers for  $\geq 3$ , 2, 1 and 0 types of geometric quality criteria. A grey segment represents the fraction of residues that are not modelled. The numeric value for each fraction is indicated below the corresponding segment, with a dot representing fractions  $\leq 5\%$

| Mol | Chain | Length | Quality of chain |     |
|-----|-------|--------|------------------|-----|
| 1   | A     | 965    | 61%              | 39% |
| 2   | B     | 639    | 55%              | 45% |
| 3   | C     | 213    | 55%              | 45% |
| 4   | D     | 213    | 49%              | 50% |
| 5   | E     | 212    | 54%              | 46% |
| 6   | F     | 214    | 50%              | 50% |

## 2 Entry composition i

There are 9 unique types of molecules in this entry. The entry contains 7338 atoms, of which 0 are hydrogens and 0 are deuteriums.

In the tables below, the AltConf column contains the number of residues with at least one atom in alternate conformation and the Trace column contains the number of residues modelled with at most 2 atoms.

- Molecule 1 is a protein called Integrin alpha-V.

| Mol | Chain | Residues | Atoms |      |     |     | AltConf | Trace |
|-----|-------|----------|-------|------|-----|-----|---------|-------|
|     |       |          | Total | C    | N   | O   |         |       |
| 1   | A     | 593      | 2982  | 1784 | 599 | 599 | 0       | 0     |

- Molecule 2 is a protein called Integrin beta-8.

| Mol | Chain | Residues | Atoms |      |     |     | AltConf | Trace |
|-----|-------|----------|-------|------|-----|-----|---------|-------|
|     |       |          | Total | C    | N   | O   |         |       |
| 2   | B     | 353      | 1791  | 1075 | 358 | 358 | 0       | 0     |

- Molecule 3 is a protein called 8B8 heavy chain Fab.

| Mol | Chain | Residues | Atoms |     |     |     | AltConf | Trace |
|-----|-------|----------|-------|-----|-----|-----|---------|-------|
|     |       |          | Total | C   | N   | O   |         |       |
| 3   | C     | 117      | 585   | 351 | 117 | 117 | 0       | 0     |

- Molecule 4 is a protein called 8B8 light chain Fab.

| Mol | Chain | Residues | Atoms |     |     |     | AltConf | Trace |
|-----|-------|----------|-------|-----|-----|-----|---------|-------|
|     |       |          | Total | C   | N   | O   |         |       |
| 4   | D     | 107      | 536   | 322 | 107 | 107 | 0       | 0     |

- Molecule 5 is a protein called 68 heavy chain Fab.

| Mol | Chain | Residues | Atoms |     |     |     | AltConf | Trace |
|-----|-------|----------|-------|-----|-----|-----|---------|-------|
|     |       |          | Total | C   | N   | O   |         |       |
| 5   | E     | 115      | 569   | 339 | 115 | 115 | 0       | 0     |

- Molecule 6 is a protein called 68 light chain Fab.

| Mol | Chain | Residues | Atoms |     |     |     | AltConf | Trace |
|-----|-------|----------|-------|-----|-----|-----|---------|-------|
|     |       |          | Total | C   | N   | O   |         |       |
| 6   | F     | 108      | 540   | 324 | 108 | 108 | 0       | 0     |

- Molecule 7 is a ligand with the chemical component id NAG but its atom names do not match the existing wwPDB Chemical Component Dictionary definition for NAG. Consequently no firm identification of ligand chemistry can be made. Once the structure is annotated then an identification and diagram will be given here.

| Mol | Chain | Residues | Atoms |    |    |    | AltConf |
|-----|-------|----------|-------|----|----|----|---------|
| 7   | A     | 1        | Total | C  | N  | O  | 0       |
|     |       |          | 154   | 88 | 11 | 55 |         |
| 7   | A     | 1        | Total | C  | N  | O  | 0       |
|     |       |          | 154   | 88 | 11 | 55 |         |
| 7   | A     | 1        | Total | C  | N  | O  | 0       |
|     |       |          | 154   | 88 | 11 | 55 |         |
| 7   | A     | 1        | Total | C  | N  | O  | 0       |
|     |       |          | 154   | 88 | 11 | 55 |         |
| 7   | A     | 1        | Total | C  | N  | O  | 0       |
|     |       |          | 154   | 88 | 11 | 55 |         |
| 7   | A     | 1        | Total | C  | N  | O  | 0       |
|     |       |          | 154   | 88 | 11 | 55 |         |
| 7   | A     | 1        | Total | C  | N  | O  | 0       |
|     |       |          | 154   | 88 | 11 | 55 |         |
| 7   | A     | 1        | Total | C  | N  | O  | 0       |
|     |       |          | 154   | 88 | 11 | 55 |         |
| 7   | A     | 1        | Total | C  | N  | O  | 0       |
|     |       |          | 154   | 88 | 11 | 55 |         |
| 7   | B     | 1        | Total | C  | N  | O  | 0       |
|     |       |          | 126   | 72 | 9  | 45 |         |
| 7   | B     | 1        | Total | C  | N  | O  | 0       |
|     |       |          | 126   | 72 | 9  | 45 |         |
| 7   | B     | 1        | Total | C  | N  | O  | 0       |
|     |       |          | 126   | 72 | 9  | 45 |         |
| 7   | B     | 1        | Total | C  | N  | O  | 0       |
|     |       |          | 126   | 72 | 9  | 45 |         |
| 7   | B     | 1        | Total | C  | N  | O  | 0       |
|     |       |          | 126   | 72 | 9  | 45 |         |
| 7   | B     | 1        | Total | C  | N  | O  | 0       |
|     |       |          | 126   | 72 | 9  | 45 |         |
| 7   | B     | 1        | Total | C  | N  | O  | 0       |
|     |       |          | 126   | 72 | 9  | 45 |         |

Continued on next page...

Continued from previous page...

| Mol | Chain | Residues | Atoms |    |   | AltConf |   |
|-----|-------|----------|-------|----|---|---------|---|
|     |       |          | Total | C  | N |         | O |
| 7   | B     | 1        | 126   | 72 | 9 | 45      | 0 |

- Molecule 8 is BETA-D-MANNOSE (three-letter code: BMA) (formula:  $C_6H_{12}O_6$ ).

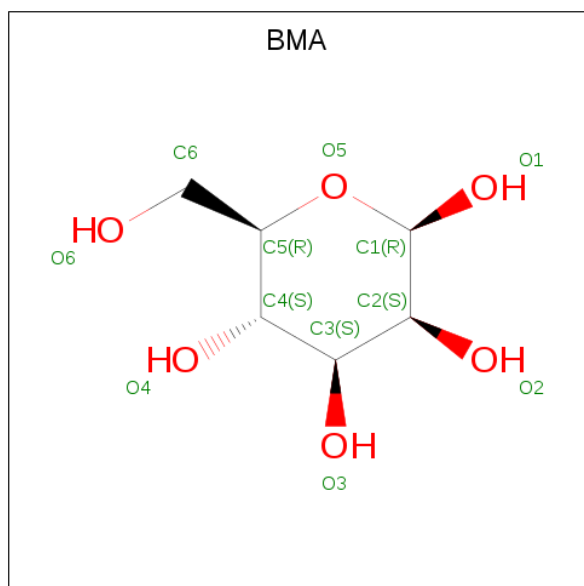

| Mol | Chain | Residues | Atoms |   |   | AltConf |
|-----|-------|----------|-------|---|---|---------|
|     |       |          | Total | C | O |         |
| 8   | A     | 1        | 11    | 6 | 5 | 0       |
| 8   | B     | 1        | 11    | 6 | 5 | 0       |

- Molecule 9 is ALPHA-D-MANNOSE (three-letter code: MAN) (formula:  $C_6H_{12}O_6$ ).

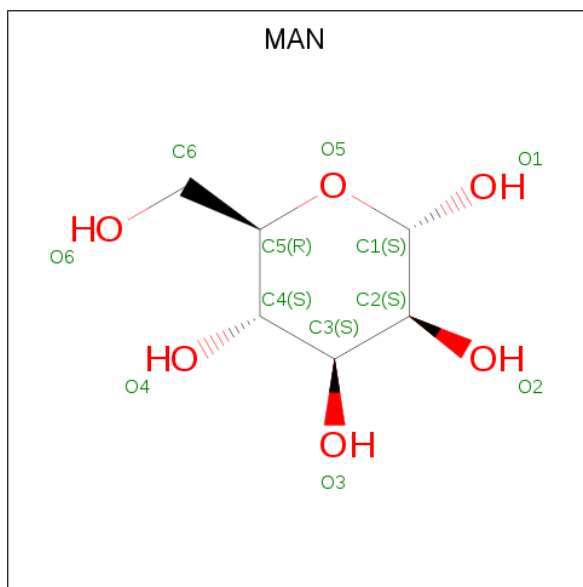

| Mol | Chain | Residues | Atoms |    |    | AltConf |
|-----|-------|----------|-------|----|----|---------|
|     |       |          | Total | C  | O  |         |
| 9   | A     | 1        | 33    | 18 | 15 | 0       |
| 9   | A     | 1        | 33    | 18 | 15 | 0       |
| 9   | A     | 1        | 33    | 18 | 15 | 0       |

PRELIMINARY

VALIDATION REPORT

### 3 Residue-property plots [i](#)

These plots are drawn for all protein, RNA and DNA chains in the entry. The first graphic for a chain summarises the proportions of the various outlier classes displayed in the second graphic. The second graphic shows the sequence view annotated by issues in geometry. Residues are color-coded according to the number of geometric quality criteria for which they contain at least one outlier: green = 0, yellow = 1, orange = 2 and red = 3 or more. Stretches of 2 or more consecutive residues without any outlier are shown as a green connector. Residues present in the sample, but not in the model, are shown in grey.

- Molecule 1: Integrin alpha-V

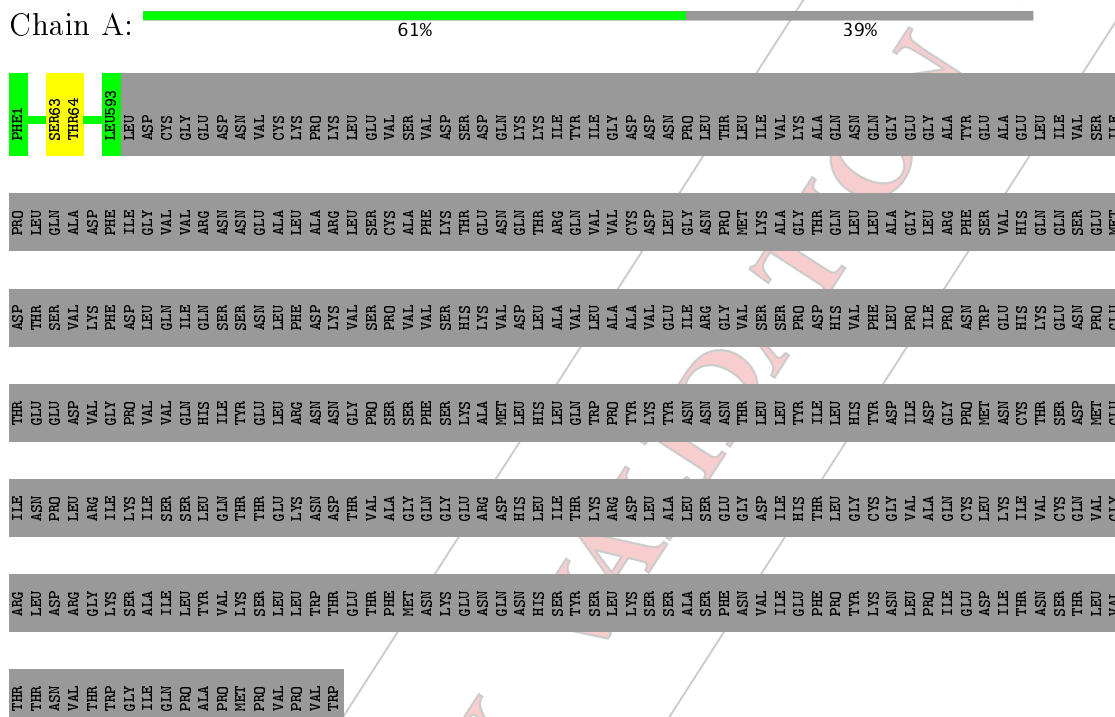

- Molecule 2: Integrin beta-8

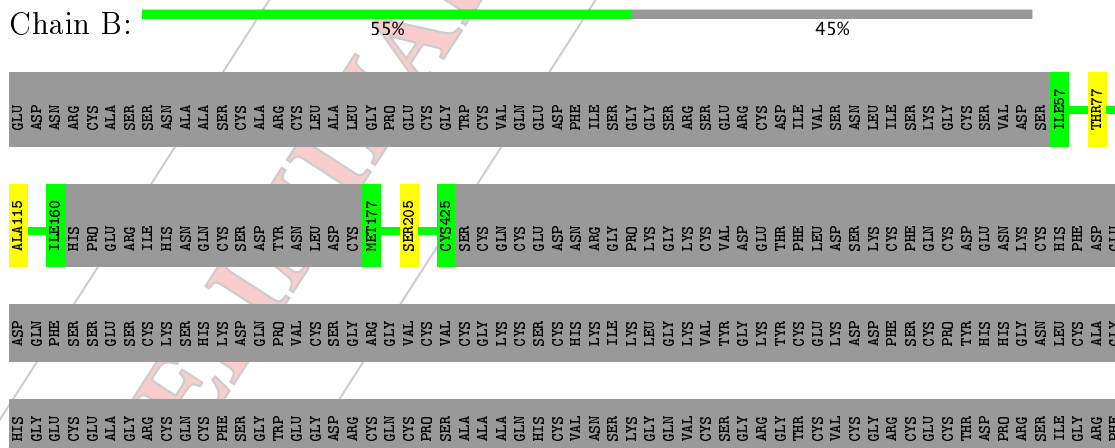

CYS  
GLU  
SER  
HIS  
CYS  
PRO  
THR  
CYS  
TYR  
THR  
ALA  
CYS  
LYS  
GLU  
ASN  
TRP  
ASN  
CYS  
MET  
GLN  
CYS  
LEU  
HIS  
PRO  
HIS  
ASN  
LEU  
SER  
GLN  
ALA  
ILE  
LEU  
ASP  
GLN  
CYS  
LYS  
THR  
SER  
CYS  
ALA  
LEU  
MET  
GLU  
GLN  
THR  
HIS  
TYR  
VAL  
ASP  
GLN  
THR  
SER  
GLU  
CYS  
PHE  
SER  
SER  
PRO  
SER

• Molecule 3: 8B8 heavy chain Fab

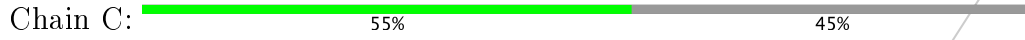

GLU  
SER  
GLN  
ASP  
LEU  
TYR  
THR  
LEU  
SER  
SER  
ALA  
SER  
VAL  
TYR  
PRO  
LEU  
ALA  
TRP  
VAL  
CYS  
GLY  
SER  
GLN  
THR  
HIS  
SER  
SER  
VAL  
THR  
LEU  
GLY  
CYS  
ASN  
VAL  
THR  
LEU  
GLY  
HIS  
PRO  
CYS  
ILE  
LEU  
ASP  
GLN  
VAL  
LEU  
THR  
SER  
ASP  
GLU  
VAL  
THR  
LEU  
MET  
GLU  
GLN  
THR  
HIS  
TYR  
VAL  
ASP  
GLN  
THR  
SER  
GLU  
CYS  
PHE  
SER  
SER  
PRO  
SER

• Molecule 4: 8B8 light chain Fab

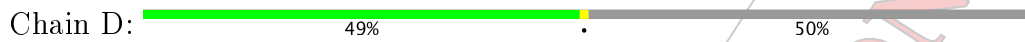

GLU  
SER  
GLN  
ASP  
LEU  
TYR  
THR  
LEU  
SER  
SER  
ALA  
SER  
VAL  
TYR  
PRO  
LEU  
ALA  
TRP  
VAL  
CYS  
GLY  
SER  
GLN  
THR  
HIS  
SER  
SER  
VAL  
THR  
LEU  
GLY  
CYS  
ASN  
VAL  
THR  
LEU  
GLY  
HIS  
PRO  
CYS  
ILE  
LEU  
ASP  
GLN  
VAL  
LEU  
THR  
SER  
ASP  
GLU  
VAL  
THR  
LEU  
MET  
GLU  
GLN  
THR  
HIS  
TYR  
VAL  
ASP  
GLN  
THR  
SER  
GLU  
CYS  
PHE  
SER  
SER  
PRO  
SER

• Molecule 5: 68 heavy chain Fab

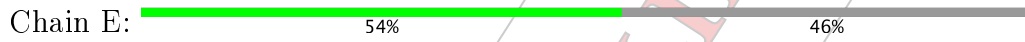

GLU  
SER  
GLN  
ASP  
LEU  
TYR  
THR  
LEU  
SER  
SER  
ALA  
SER  
VAL  
TYR  
PRO  
LEU  
ALA  
TRP  
VAL  
CYS  
GLY  
SER  
GLN  
THR  
HIS  
SER  
SER  
VAL  
THR  
LEU  
GLY  
CYS  
ASN  
VAL  
THR  
LEU  
GLY  
HIS  
PRO  
CYS  
ILE  
LEU  
ASP  
GLN  
VAL  
LEU  
THR  
SER  
ASP  
GLU  
VAL  
THR  
LEU  
MET  
GLU  
GLN  
THR  
HIS  
TYR  
VAL  
ASP  
GLN  
THR  
SER  
GLU  
CYS  
PHE  
SER  
SER  
PRO  
SER

• Molecule 6: 68 light chain Fab

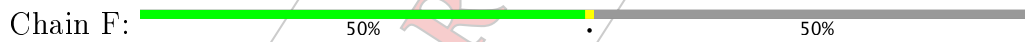

ASP  
SER  
GLN  
ASP  
LEU  
TYR  
THR  
LEU  
SER  
SER  
ALA  
SER  
VAL  
TYR  
PRO  
LEU  
ALA  
TRP  
VAL  
CYS  
GLY  
SER  
GLN  
THR  
HIS  
SER  
SER  
VAL  
THR  
LEU  
GLY  
CYS  
ASN  
VAL  
THR  
LEU  
GLY  
HIS  
PRO  
CYS  
ILE  
LEU  
ASP  
GLN  
VAL  
LEU  
THR  
SER  
ASP  
GLU  
VAL  
THR  
LEU  
MET  
GLU  
GLN  
THR  
HIS  
TYR  
VAL  
ASP  
GLN  
THR  
SER  
GLU  
CYS  
PHE  
SER  
SER  
PRO  
SER

VAL  
THR  
GLU  
GLN  
ASP  
SER  
LYS  
ASP  
SER  
SER  
THR  
TYR  
SER  
SER  
LEU  
SER  
PHE  
ILE  
PHE  
LEU  
PRO  
SER  
SER  
SER  
LEU  
SER  
SER  
ASP  
GLU  
GLN  
ALA  
SER  
TYR  
GLY  
SER  
LYS  
HIS  
THR  
VAL  
VAL  
TYR  
CYS  
VAL  
VAL  
LEU  
GLU  
VAL  
THR  
HIS  
GLN  
GLY  
LEU  
SER  
SER  
PRO  
VAL  
THR  
LYS  
SER  
PHE  
LYS  
VAL  
ASP  
ARG  
ASN  
GLY  
GLU  
CYS

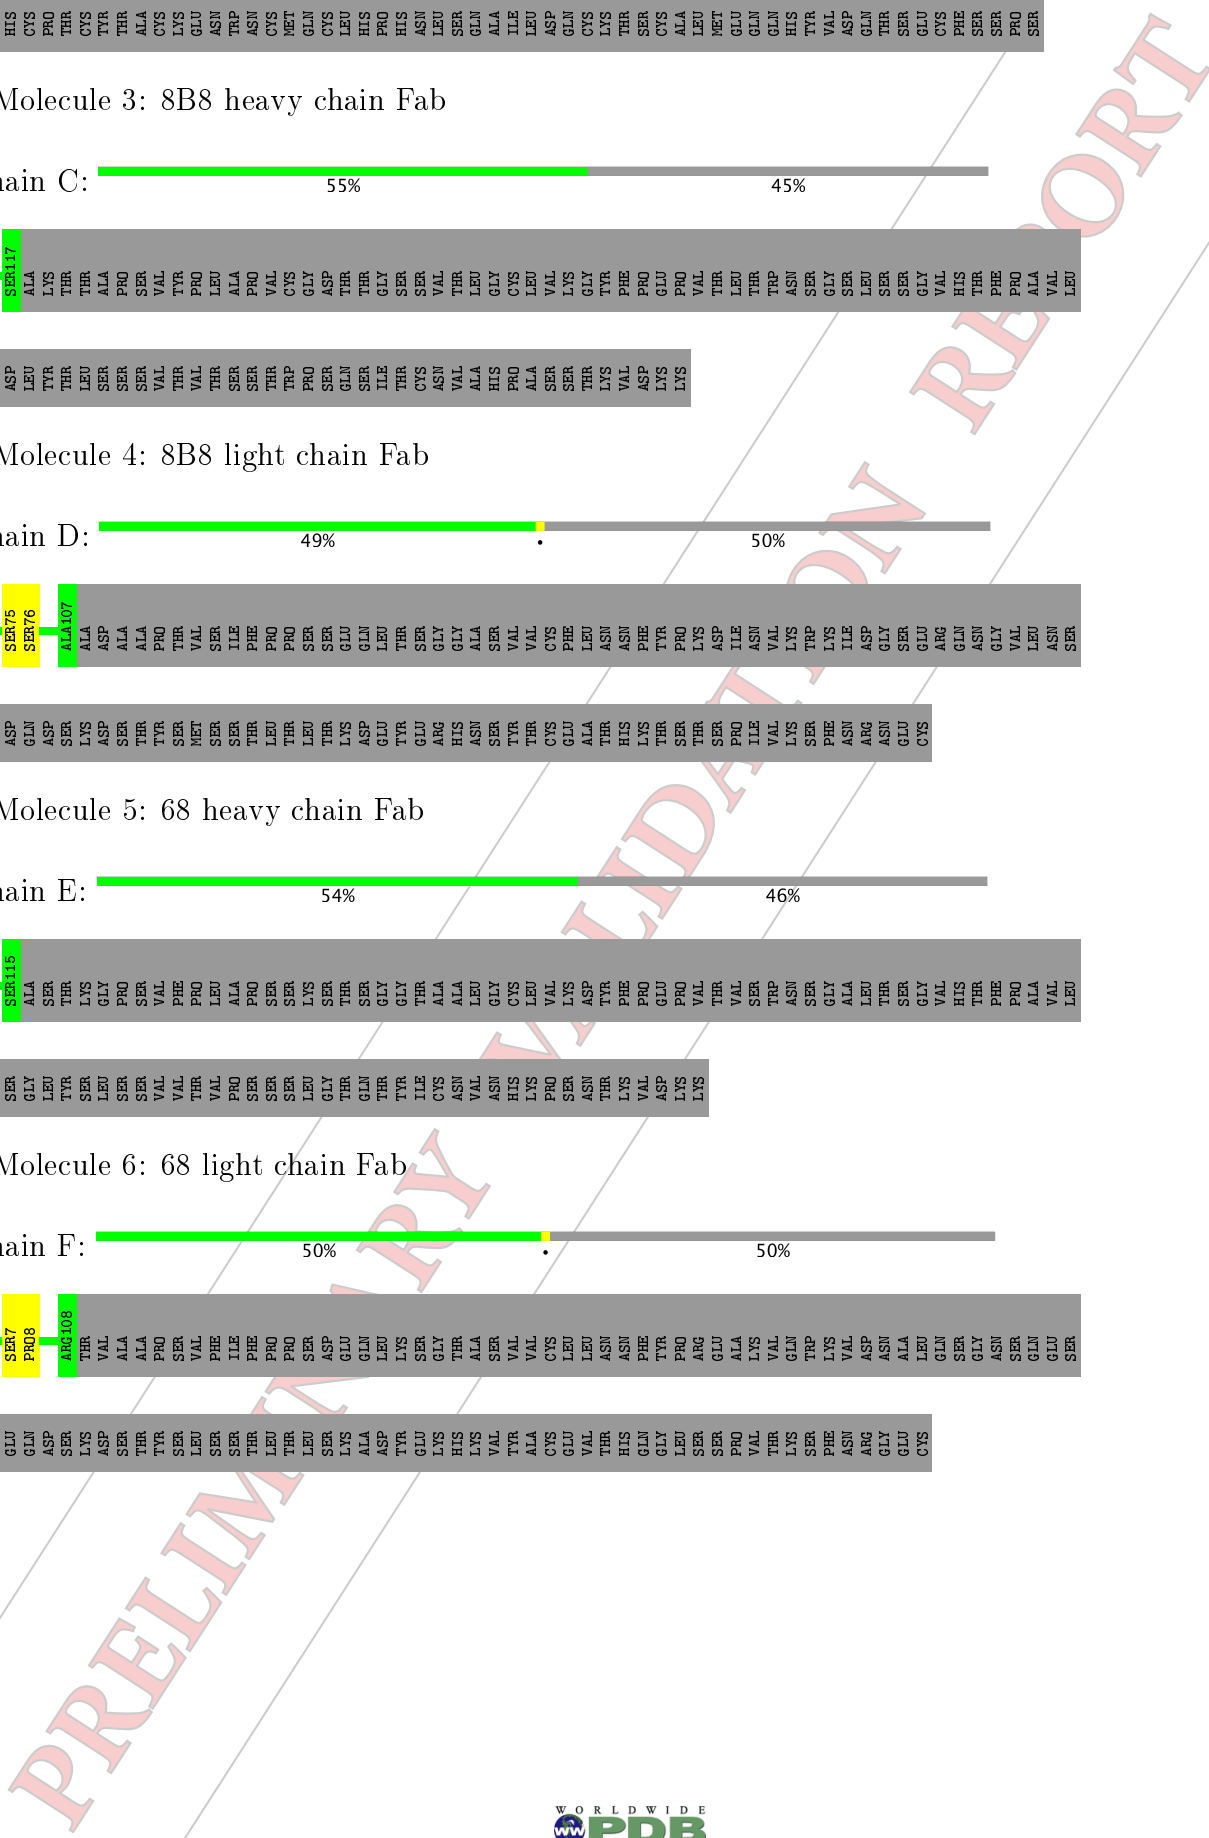



## 4 Experimental information [i](#)

| Property                             | Value               | Source    |
|--------------------------------------|---------------------|-----------|
| Reconstruction method                | Not provided        | Depositor |
| Imposed symmetry                     | POINT, Not provided | Depositor |
| Number of images used                | Not provided        | Depositor |
| Resolution determination method      | Not provided        | Depositor |
| CTF correction method                | Not provided        | Depositor |
| Microscope                           | Not provided        | Depositor |
| Voltage (kV)                         | Not provided        | Depositor |
| Electron dose ( $e^-/\text{\AA}^2$ ) | Not provided        | Depositor |
| Minimum defocus (nm)                 | Not provided        | Depositor |
| Maximum defocus (nm)                 | Not provided        | Depositor |
| Magnification                        | Not provided        | Depositor |
| Image detector                       | Not provided        | Depositor |

PRELIMINARY

VALIDATION REPORT

## 5 Model quality [i](#)

### 5.1 Standard geometry [i](#)

Bond lengths and bond angles in the following residue types are not validated in this section: BMA, NAG, MAN

The Z score for a bond length (or angle) is the number of standard deviations the observed value is removed from the expected value. A bond length (or angle) with  $|Z| > 5$  is considered an outlier worth inspection. RMSZ is the root-mean-square of all Z scores of the bond lengths (or angles).

| Mol | Chain | Bond lengths |         | Bond angles |               |
|-----|-------|--------------|---------|-------------|---------------|
|     |       | RMSZ         | # Z  >2 | RMSZ        | # Z  >2       |
| 1   | A     | 0.55         | 0/3009  | 0.85        | 0/4198        |
| 2   | B     | 0.54         | 0/1806  | 0.88        | 1/2524 (0.0%) |
| 3   | C     | 0.56         | 0/588   | 0.92        | 0/820         |
| 4   | D     | 0.58         | 0/540   | 0.90        | 0/753         |
| 5   | E     | 0.59         | 0/571   | 0.86        | 0/793         |
| 6   | F     | 0.54         | 0/544   | 0.92        | 0/758         |
| All | All   | 0.55         | 0/7058  | 0.88        | 1/9846 (0.0%) |

There are no bond length outliers.

All (1) bond angle outliers are listed below:

| Mol | Chain | Res | Type | Atoms  | Z    | Observed(°) | Ideal(°) |
|-----|-------|-----|------|--------|------|-------------|----------|
| 2   | B     | 77  | THR  | N-CA-C | 5.95 | 127.05      | 111.00   |

There are no chirality outliers.

There are no planarity outliers.

### 5.2 Too-close contacts [i](#)

In the following table, the Non-H and H(model) columns list the number of non-hydrogen atoms and hydrogen atoms in the chain respectively. The H(added) column lists the number of hydrogen atoms added and optimized by MolProbity. The Clashes column lists the number of clashes within the asymmetric unit, whereas Symm-Clashes lists symmetry related clashes.

| Mol | Chain | Non-H | H(model) | H(added) | Clashes | Symm-Clashes |
|-----|-------|-------|----------|----------|---------|--------------|
| 1   | A     | 2982  | 0        | 1553     | 1       | 0            |
| 2   | B     | 1791  | 0        | 884      | 1       | 0            |
| 3   | C     | 585   | 0        | 267      | 0       | 0            |
| 4   | D     | 536   | 0        | 280      | 1       | 0            |

*Continued on next page...*

Continued from previous page...

| Mol | Chain | Non-H | H(model) | H(added) | Clashes | Symm-Clashes |
|-----|-------|-------|----------|----------|---------|--------------|
| 5   | E     | 569   | 0        | 283      | 0       | 0            |
| 6   | F     | 540   | 0        | 262      | 1       | 0            |
| 7   | A     | 154   | 0        | 93       | 0       | 0            |
| 7   | B     | 126   | 0        | 76       | 0       | 0            |
| 8   | A     | 11    | 0        | 7        | 0       | 0            |
| 8   | B     | 11    | 0        | 9        | 0       | 0            |
| 9   | A     | 33    | 0        | 26       | 0       | 0            |
| All | All   | 7338  | 0        | 3740     | 4       | 0            |

The all-atom clashscore is defined as the number of clashes found per 1000 atoms (including hydrogen atoms). The all-atom clashscore for this structure is 0.

All (4) close contacts within the same asymmetric unit are listed below, sorted by their clash magnitude.

| Atom-1        | Atom-2        | Interatomic distance (Å) | Clash overlap (Å) |
|---------------|---------------|--------------------------|-------------------|
| 4:D:75:SER:O  | 4:D:76:SER:C  | 2.51                     | 0.48              |
| 1:A:63:SER:O  | 1:A:64:THR:C  | 2.56                     | 0.44              |
| 6:F:7:SER:N   | 6:F:8:PRO:CD  | 2.80                     | 0.44              |
| 2:B:115:ALA:N | 2:B:205:SER:O | 2.54                     | 0.40              |

There are no symmetry-related clashes.

## 5.3 Torsion angles [i](#)

### 5.3.1 Protein backbone [i](#)

In the following table, the Percentiles column shows the percent Ramachandran outliers of the chain as a percentile score with respect to all PDB entries followed by that with respect to all EM entries.

The Analysed column shows the number of residues for which the backbone conformation was analysed, and the total number of residues.

| Mol | Chain | Analysed      | Favoured  | Allowed  | Outliers | Percentiles |     |
|-----|-------|---------------|-----------|----------|----------|-------------|-----|
| 1   | A     | 591/965 (61%) | 570 (96%) | 21 (4%)  | 0        | 100         | 100 |
| 2   | B     | 349/639 (55%) | 334 (96%) | 15 (4%)  | 0        | 100         | 100 |
| 3   | C     | 115/213 (54%) | 104 (90%) | 11 (10%) | 0        | 100         | 100 |
| 4   | D     | 105/213 (49%) | 98 (93%)  | 7 (7%)   | 0        | 100         | 100 |
| 5   | E     | 113/212 (53%) | 110 (97%) | 3 (3%)   | 0        | 100         | 100 |

Continued on next page...

Continued from previous page...

| Mol | Chain | Analysed        | Favoured   | Allowed | Outliers | Percentiles |     |
|-----|-------|-----------------|------------|---------|----------|-------------|-----|
| 6   | F     | 106/214 (50%)   | 99 (93%)   | 7 (7%)  | 0        | 100         | 100 |
| All | All   | 1379/2456 (56%) | 1315 (95%) | 64 (5%) | 0        | 100         | 100 |

There are no Ramachandran outliers to report.

### 5.3.2 Protein sidechains [i](#)

In the following table, the Percentiles column shows the percent sidechain outliers of the chain as a percentile score with respect to all PDB entries followed by that with respect to all EM entries.

The Analysed column shows the number of residues for which the sidechain conformation was analysed, and the total number of residues.

| Mol | Chain | Analysed     | Rotameric | Outliers | Percentiles |     |
|-----|-------|--------------|-----------|----------|-------------|-----|
| 1   | A     | 34/819 (4%)  | 34 (100%) | 0        | 100         | 100 |
| 2   | B     | 22/561 (4%)  | 22 (100%) | 0        | 100         | 100 |
| 3   | C     | 4/192 (2%)   | 4 (100%)  | 0        | 100         | 100 |
| 4   | D     | 5/185 (3%)   | 5 (100%)  | 0        | 100         | 100 |
| 5   | E     | 3/178 (2%)   | 3 (100%)  | 0        | 100         | 100 |
| 6   | F     | 5/190 (3%)   | 5 (100%)  | 0        | 100         | 100 |
| All | All   | 73/2125 (3%) | 73 (100%) | 0        | 100         | 100 |

There are no protein residues with a non-rotameric sidechain to report.

Some sidechains can be flipped to improve hydrogen bonding and reduce clashes. There are no such sidechains identified.

### 5.3.3 RNA [i](#)

There are no RNA molecules in this entry.

## 5.4 Non-standard residues in protein, DNA, RNA chains [i](#)

There are no non-standard protein/DNA/RNA residues in this entry.

## 5.5 Carbohydrates [i](#)

There are no carbohydrates in this entry.

## 5.6 Ligand geometry [i](#)

Of 25 ligands modelled in this entry, 20 could not be matched to an existing wwPDB Chemical Component Dictionary definition at this stage - leaving 5 for Mogul analysis.

In the following table, the Counts columns list the number of bonds (or angles) for which Mogul statistics could be retrieved, the number of bonds (or angles) that are observed in the model and the number of bonds (or angles) that are defined in the Chemical Component Dictionary. The Link column lists molecule types, if any, to which the group is linked. The Z score for a bond length (or angle) is the number of standard deviations the observed value is removed from the expected value. A bond length (or angle) with  $|Z| > 2$  is considered an outlier worth inspection. RMSZ is the root-mean-square of all Z scores of the bond lengths (or angles).

| Mol | Type | Chain | Res  | Link | Bond lengths |      |          | Bond angles |      |          |
|-----|------|-------|------|------|--------------|------|----------|-------------|------|----------|
|     |      |       |      |      | Counts       | RMSZ | # Z  > 2 | Counts      | RMSZ | # Z  > 2 |
| 8   | BMA  | A     | 2268 | 9,7  | 11,11,12     | 1.80 | 2 (18%)  | 15,15,17    | 0.99 | 1 (6%)   |
| 9   | MAN  | A     | 2269 | 8    | 11,11,12     | 1.77 | 2 (18%)  | 15,15,17    | 1.16 | 2 (13%)  |
| 9   | MAN  | A     | 2270 | 9,8  | 11,11,12     | 1.81 | 3 (27%)  | 15,15,17    | 1.19 | 1 (6%)   |
| 9   | MAN  | A     | 2271 | 9    | 11,11,12     | 1.77 | 2 (18%)  | 15,15,17    | 1.23 | 3 (20%)  |
| 8   | BMA  | B     | 2416 | 7    | 11,11,12     | 1.78 | 2 (18%)  | 15,15,17    | 1.10 | 2 (13%)  |

In the following table, the Chirals column lists the number of chiral outliers, the number of chiral centers analysed, the number of these observed in the model and the number defined in the Chemical Component Dictionary. Similar counts are reported in the Torsion and Rings columns. '-' means no outliers of that kind were identified.

| Mol | Type | Chain | Res  | Link | Chirals | Torsions  | Rings   |
|-----|------|-------|------|------|---------|-----------|---------|
| 8   | BMA  | A     | 2268 | 9,7  | -       | 0/2/19/22 | 0/1/1/1 |
| 9   | MAN  | A     | 2269 | 8    | -       | 0/2/19/22 | 0/1/1/1 |
| 9   | MAN  | A     | 2270 | 9,8  | -       | 0/2/19/22 | 0/1/1/1 |
| 9   | MAN  | A     | 2271 | 9    | -       | 0/2/19/22 | 0/1/1/1 |
| 8   | BMA  | B     | 2416 | 7    | -       | 0/2/19/22 | 0/1/1/1 |

All (11) bond length outliers are listed below:

| Mol | Chain | Res  | Type | Atoms | Z     | Observed(Å) | Ideal(Å) |
|-----|-------|------|------|-------|-------|-------------|----------|
| 9   | A     | 2271 | MAN  | O2-C2 | -4.06 | 1.34        | 1.43     |
| 9   | A     | 2269 | MAN  | O2-C2 | -4.03 | 1.34        | 1.43     |
| 9   | A     | 2270 | MAN  | O2-C2 | -3.99 | 1.34        | 1.43     |

*Continued on next page...*

Continued from previous page...

| Mol | Chain | Res  | Type | Atoms | Z     | Observed(Å) | Ideal(Å) |
|-----|-------|------|------|-------|-------|-------------|----------|
| 8   | B     | 2416 | BMA  | O2-C2 | -3.98 | 1.34        | 1.43     |
| 8   | A     | 2268 | BMA  | O2-C2 | -3.94 | 1.34        | 1.43     |
| 8   | B     | 2416 | BMA  | C2-C3 | -2.32 | 1.49        | 1.52     |
| 9   | A     | 2270 | MAN  | C2-C3 | -2.28 | 1.49        | 1.52     |
| 9   | A     | 2269 | MAN  | C2-C3 | -2.28 | 1.49        | 1.52     |
| 9   | A     | 2271 | MAN  | C2-C3 | -2.27 | 1.49        | 1.52     |
| 8   | A     | 2268 | BMA  | C2-C3 | -2.25 | 1.49        | 1.52     |
| 9   | A     | 2270 | MAN  | C4-C5 | 2.32  | 1.58        | 1.53     |

All (9) bond angle outliers are listed below:

| Mol | Chain | Res  | Type | Atoms    | Z     | Observed(°) | Ideal(°) |
|-----|-------|------|------|----------|-------|-------------|----------|
| 9   | A     | 2271 | MAN  | C2-C3-C4 | -2.41 | 106.69      | 110.87   |
| 8   | A     | 2268 | BMA  | C2-C3-C4 | -2.32 | 106.83      | 110.87   |
| 9   | A     | 2269 | MAN  | C2-C3-C4 | -2.27 | 106.92      | 110.87   |
| 8   | B     | 2416 | BMA  | O5-C1-C2 | -2.23 | 107.30      | 110.78   |
| 9   | A     | 2271 | MAN  | O5-C1-C2 | -2.23 | 107.30      | 110.78   |
| 8   | B     | 2416 | BMA  | C2-C3-C4 | -2.17 | 107.10      | 110.87   |
| 9   | A     | 2270 | MAN  | C3-C4-C5 | -2.15 | 106.40      | 110.24   |
| 9   | A     | 2269 | MAN  | C1-C2-C3 | 2.40  | 112.69      | 109.66   |
| 9   | A     | 2271 | MAN  | C1-C2-C3 | 2.47  | 112.78      | 109.66   |

There are no chirality outliers.

There are no torsion outliers.

There are no ring outliers.

No monomer is involved in short contacts.

## 5.7 Other polymers [i](#)

There are no such residues in this entry.

## 5.8 Polymer linkage issues [i](#)

There are no chain breaks in this entry.
