# Supplementary material
Source: PubMed Central journal article supplement (PMC6214843)
Supplement: NIHMS977256-supplement-3.pdf [file NIHMS977256-supplement-3.pdf]

# Supplementary Table 1

| 3-D integrin structures: Ectodomain                    |         |                                 |                                                                                 |            |      |                                           |
|--------------------------------------------------------|---------|---------------------------------|---------------------------------------------------------------------------------|------------|------|-------------------------------------------|
| Integrin                                               | Method  | Domains                         | Conformation                                                                    | Resolution | PDB  | Ref                                       |
| $\alpha v\beta 3$                                      | Crystal | Ectodomain                      | Bent                                                                            | 3.1 Å      | 1JV2 | Xiong (2001)                              |
|                                                        |         | Ectodomain + RGD peptide        | Bent                                                                            | 3.2 Å      | 1L5G | Xiong (2002)                              |
|                                                        |         | Ectodomain + Mn <sup>2+</sup>   | Bent                                                                            | 3.3 Å      | 1M1X | Xiong (2002)                              |
|                                                        |         | Ectodomain                      | Bent                                                                            | 3.1 Å      | 1U8C | Xiong (2004)                              |
|                                                        |         | Ectodomain + TM                 | Bent                                                                            | 2.9 Å      | 3IJE | Xiong (2009)                              |
|                                                        |         | Ectodomain + Coiled-Coil Tag    | Bent                                                                            | 3.0 Å      | 4G1E | Dong (2012)                               |
|                                                        |         | Ectodomain + Fibronectin domain | Bent                                                                            | 3.32 Å     | 4MMX | Van Agthoven (2014)                       |
|                                                        |         | Ectodomain + Fibronectin domain | Bent                                                                            | 3.18 Å     | 4MMY | Van Agthoven (2014)                       |
|                                                        |         | Ectodomain + Fibronectin domain | Bent                                                                            | 3.1 Å      | 4MMZ | Van Agthoven (2014)                       |
|                                                        |         | Ectodomain + Fab 17E6           | Bent                                                                            | 3.61 Å     | 4O02 | Mahalingam (2014)                         |
|                                                        | ns-EM   | Ectodomain                      | Bent / Extended closed / Extended open                                          | 44 - 52 Å  |      | Veesler (2014)                            |
|                                                        |         | Ectodomain + pb9                | Bent / Extended closed / Extended open                                          | 50 - 60 Å  |      | Veesler (2014)                            |
|                                                        |         | Ectodomain + Fab LM609          | Bent                                                                            | 35 Å       | 6AVQ | Borst (2017)                              |
|                                                        |         | Ectodomain + Fab LM609          | Partially extended                                                              | 35 Å       | 6AVR | Borst (2017)                              |
| $\alpha_{iib}\beta 3$                                  | Crystal | Ectodomain                      | Extended open                                                                   | 35 Å       | 6AVU | Borst (2017)                              |
|                                                        |         | Ectodomain                      | Bent                                                                            | 2.55 Å     | 3FCS | Zhu (2008)                                |
| $\alpha x\beta 2$                                      | Crystal | Ectodomain                      | Bent                                                                            | 3.5 Å      | 3K6S | Xie (2010)                                |
|                                                        |         | Ectodomain                      | Bent                                                                            | 3.95 Å     | 3K71 | Xie (2010)                                |
|                                                        |         | Ectodomain                      | Bent                                                                            | 3.7 Å      | 3K72 | Xie (2010)                                |
|                                                        |         | Ectodomain                      | Bent                                                                            | 2.75 Å     | 4NEH | Sen (2013)                                |
|                                                        |         | Ectodomain                      | Bent                                                                            | 2.9 Å      | 4NEN | Sen (2013)                                |
| 3-D integrin structures: Intact integrin               |         |                                 |                                                                                 |            |      |                                           |
| $\alpha_{iib}\beta 3$                                  | ns-EM   | Intact in nanodisc              | Bent/partially extended (headpiece pointing away from membrane)                 | 20.5 Å     | 4CAK | Choi (2013)                               |
|                                                        | Cryo-EM | Intact in nanodisc              | Bent/ partially extended/fully extended (headpiece pointing away from membrane) | >20 Å      |      | Xu (2016)                                 |
|                                                        |         | Intact                          | Extended?                                                                       | ~20 Å      |      | Adair (2002)                              |
| 2-D integrin structures: Intact integrin or ectodomain |         |                                 |                                                                                 |            |      |                                           |
| $\alpha_{iib}\beta 3$                                  | ns-EM   | Intact/nanodisc                 | Bent/ extended+ talin                                                           |            |      | Ye (2010)                                 |
|                                                        |         | Intact/nanodisc                 | Bent ± Mn <sup>2+</sup><br>Extended open ± fibrin                               |            |      | Dai (2015)                                |
| $\alpha_x\beta 2$                                      | ns-EM   | Ectodomain                      | Bent / extended closed / extended open                                          |            |      | Nishida (2006)<br>Xie (2010)              |
| $\alpha_L\beta 2$                                      | ns-EM   | Ectodomain                      | Bent / extended closed / extended open                                          |            |      | Nishida (2006)                            |
| $\alpha 5\beta 1$                                      | ns-EM   | Ectodomain                      | Bent / extended closed / extended open ± ligand                                 |            |      | Su (2016)                                 |
| $\alpha v\beta 3$                                      | ns-EM   | Ectodomain                      | Bent / extended closed / extended open                                          |            |      | Takagi (2002)                             |
| $\alpha v\beta 6$                                      | ns-EM   | Ectodomain                      | Bent / extended closed or open ± L-TGFβ1                                        |            |      | Dong (2014)<br>Dong (2017)<br>Wang (2017) |
| $\alpha v\beta 8$                                      | ns-EM   | Ectodomain                      | Extended closed ± L-TGFβ1                                                       |            |      | Minagawa (2014)<br>Wang (2017)            |

## Supplementary Table 2

|      | Subunit    | Domain        | Consensus sequence | Present in crystal structure? | Present in Cryo-EM map? |
|------|------------|---------------|--------------------|-------------------------------|-------------------------|
| N44  | $\alpha V$ | Head          | NTT                | yes                           | yes                     |
| N260 | $\alpha V$ | Head          | NMS                | yes                           | yes                     |
| N266 | $\alpha V$ | Head          | NFT                | yes                           | yes                     |
| N458 | $\alpha V$ | Thigh         | NKT                | yes                           | yes                     |
| N524 | $\alpha V$ | Thigh         | NMT                | yes                           | yes                     |
| N585 | $\alpha V$ | Thigh         | NIS                | yes                           | yes                     |
| N674 | $\alpha V$ | Calf 1        | NQT                | no                            | no                      |
| N805 | $\alpha V$ | Calf 2        | NNT                | yes                           | ?                       |
| N821 | $\alpha V$ | Calf 2        | NCT                | yes                           | yes                     |
| N844 | $\alpha V$ | Calf 2        | NDT                | N/A*                          | N/A**                   |
| N915 | $\alpha V$ | Calf 2        | NHS                | no                            | no                      |
| N943 | $\alpha V$ | Calf 2        | NST                | yes                           | yes                     |
| N950 | $\alpha V$ | Calf 2        | NVT                | yes                           | yes                     |
| N191 | $\beta 8$  | $\beta I$     | NIT                | N/A                           | yes                     |
| N360 | $\beta 8$  | Hybrid        | NIT                | N/A                           | yes                     |
| N379 | $\beta 8$  | Hybrid        | NVT                | N/A                           | yes                     |
| N389 | $\beta 8$  | Hybrid        | NVT                | N/A                           | yes                     |
| N414 | $\beta 8$  | Hybrid        | NET                | N/A                           | yes                     |
| N424 | $\beta 8$  | Hybrid        | NCS                | N/A                           | yes                     |
| N606 | $\beta 8$  | $\beta$ -tail | NLS                | N/A                           | ?                       |

\* in a flexible loop not defined in 3IJE

\*\* in a flexible loop not visible in the Cryo-EM map

? difficult to determine presence/absence of glycan

### Supplementary Table 3

| human $\alpha$ vc-c mutagenic primers sequence      |
|-----------------------------------------------------|
| 5'-GGGCTGCTCGAAGCATGCCACCAAG-3'                     |
| 5'-GATAGCGTATCTGCGGGATGAATGTGAATTTAGAGACAAACTCAC-3' |
| 5'-GTGAGTTTGTCTCTAAATTCACATTCATCCCGCAGATACGCTATC-3' |
| 5'-GTTTCCATTCCACTACAGGCTGATTTTCATCGG-3'             |
| 5'-CCGATGAAATCAGCCTGTAGTGAATGGAAAC-3'               |
| 5'-GGTGGTATGTGACCTTGGATGCCCAATGAAGGCTGG-3'          |
| 5'-CCAGCCTTCATTGGGCATCCAAGGTCACATACCACC-3'          |
| 5'-CTCCTCTTATCTCAACTGCAGCTAAAACAGCAAGATCAAC-3'      |

| human $\beta$ 3 HP primers sequence     |
|-----------------------------------------|
| 5'-CTGGGATCCCAGTGTGAGTGaTaAGAGGAGGAC-3' |
| 5'-AGATGCATGCTCGAGGCATGC-3'             |
